# Supplementary material for: Krüppel-Like Factor 4 Transcriptionally Regulates TGF-β1 and Contributes to Cardiac Myofibroblast Differentiation
Source: PubMed Central journal article supplement (PMC3640021; doi:10.1371/journal.pone.0063424), 2013-04-30
Supplement: pone.0063424.s006.pdf [file pone.0063424.s006.pdf]

# Table S1

## PCR Primer

| Gene symbol      | Forward primer         | Reverse primer            | Product size (bp) |
|------------------|------------------------|---------------------------|-------------------|
| Klf1             | caagagctcgcacctaag     | gagcgaacctccagtcaca       | 92                |
| Klf2             | ctaaaggcgcacatctgcgta  | tagtggcgggtaagctcgt       | 104               |
| Klf3             | tcgcactgaaagcacaca     | tcccaggtgcattgtacg        | 62                |
| Klf4             | cgggaagggagaagacact    | gagttcctcacgccaacg        | 62                |
| Klf5             | ccggagacgatctgaaacac   | cagatacttctccatttcacatctg | 116               |
| Klf6             | tcccactgaaagcacatca    | caacctcccatgagcatct       | 68                |
| Klf7             | aagtgtaccactgcgacagg   | tcttcatatggagcgcaaga      | 61                |
| Klf8             | gagctccggacacttcagg    | catccatgtgtctatgaattatcc  | 76                |
| Klf9             | ctccgaaaagaggcacaagt   | gcgagaacttttaaggcagtc     | 143               |
| Klf10            | agccaaccatgctcaactc    | ggctttcagaaattagttcatt    | 76                |
| Klf11            | gctcatctcgcactcacac    | tgcaacttctgtcacagc        | 72                |
| Klf12            | cactattgtgtaccgctcctg  | tttactctgtctgggagataggc   | 89                |
| Klf13            | caaggcgcacctgagaac     | gcgtgcgaacttctgttg        | 79                |
| Klf14            | aagcgacatcagtgctcctt   | tgaggtgcgacgactgtag       | 61                |
| Klf15            | acaggcgagaagcccttt     | catctgagcgggaaaacct       | 64                |
| Klf16            | cacctgcggactcacaca     | cagaacggggaacttctt        | 76                |
| Klf17            | gagcaggacaataaggaacagg | attcgacactggcaccaac       | 72                |
| TGF- $\beta$ 1   | tggagcaacatgtggaactc   | cagcagccggttaccaag        | 72                |
| Col1 $\alpha$ 1  | ccgctggtcaagatggtc     | ctccagccttccaggttct       | 113               |
| Col1 $\alpha$ 2  | gcaggttcacctactctgtcct | ctgccccattcattgtct        | 63                |
| Col3 $\alpha$ 1  | tcccctggaatctgtgaatc   | tgagtccaattggggagaat      | 63                |
| $\alpha$ -SMA    | ctctctccagccatctttcat  | tataggtggttctgtggatgc     | 60                |
| $\beta$ -tubulin | cccactccatgtgagtcca    | gcaacataaatacagaggtggcta  | 65                |
